# Supplementary material for: Evidence that bottlenose dolphins can communicate with vocal signals to solve a cooperative task
Source: PubMed Central journal article supplement (PMC8074934; doi:10.1098/rsos.202073), 2021-03-17
Supplement: rsos202073_review_history.pdf [file rsos202073_review_history.pdf]

## **Evidence that bottlenose dolphins can communicate with vocal signals to solve a cooperative task**

Stephanie L. King, Emily Guarino, Katy Donegan, Christina McMullen and Kelly Jaakkola

### **Article citation details**

*R. Soc. open sci.* **8**: 202073.

<http://dx.doi.org/10.1098/rsos.202073>

### **Review timeline**

Original submission: 13 November 2020

Revised submission: 5 February 2021

Final acceptance: 19 February 2021

Note: Reports are unedited and appear as submitted by the referee. The review history appears in chronological order.

Note: This manuscript was transferred from another Royal Society journal with peer review.

## Review History

### RSOS-202073.R0 (Original submission)

#### Review form: Reviewer 1

**Is the manuscript scientifically sound in its present form?**

Yes

**Are the interpretations and conclusions justified by the results?**

Yes

**Is the language acceptable?**

Yes

**Do you have any ethical concerns with this paper?**

No

**Have you any concerns about statistical analyses in this paper?**

No

**Recommendation?**

Accept with minor revision (please list in comments)

**Comments to the Author(s)**

General comment: The authors have done a nice job addressing concerns about the use of statistics and mixed models to test whether the dolphins included in this study used vocalizations to coordinate cooperative action during an experimental task. They have been explicit about the statistics representing data for these two dyads, and it is fair for them to state that the results indicate that "at least some dolphins are capable of using vocal signals to facilitate . . . cooperative actions." These modifications do not detract from the value of the paper, which reports very interesting results.

I have a few, very minor suggestions below.

(1) Line 96, Cooperative task methods: I suggest the description and justification of trial phases (currently starting on Line 111) either be placed at the beginning of the "Cooperative task" section, or just start a new paragraph with that sentence to make the description of training phases more obvious to readers.

(2) Results: reporting the sample size

2i: Line 216: You indicate that "Given that sample sizes were limited to two dyads, . . ."

That might be better phrased: "Given that sample sizes represent repeated trials with two dyads, we are unable to use inferential statistics to generalize our findings beyond the dyads. (You can probably simplify this sentence to ". . . we are unable to generalize our findings beyond the dyads", for you are being sufficiently explicit between this and the following sentence.)

If you don't mention the repeated trials in the above sentence, please provide a clear indication of what the sample size,  $n$ , represents elsewhere in the 'Statistical analysis' section. That could be placed as a last sentence in this section, e.g., "The sample size refers to the number of replicated trials with each dyad." If you make it clear at the start of this section, this is not necessary.

2ii. When reporting the results in the figures, it would be useful for readers to have a clear indication of what the  $n$  represents. For example, in the caption for Figure 2, you can indicate: 'The sample size represents the number of trials per dyad with or without whistles.', with a similar description in other figure captions.

I'm sure the nature of the sample seems obvious to the authors. But readers may be confused at the large apparent sample. I think it is best to be up front – as you have been when revising many of the descriptions in the text. People often look at figures before reading other parts of a paper. They will probably respond more receptively if the nature of the sample is clear.

Susan Lingle

**Review form: Reviewer 2**

**Is the manuscript scientifically sound in its present form?**

No

**Are the interpretations and conclusions justified by the results?**

No

**Is the language acceptable?**

Yes

**Do you have any ethical concerns with this paper?**

No

**Have you any concerns about statistical analyses in this paper?**

Yes

**Recommendation?**

Major revision is needed (please make suggestions in comments)

**Comments to the Author(s)**

In this revised version of the manuscript the authors made an effort to acknowledge that their study was not generalizable to all dolphins. The topic remains of interest but could be introduced better (see details below) which would strengthen the paper. The use of statistics is incorrect given the data even after the modification made here. The paper can therefore not be published before all the statistical analyses have been removed.

Introduction

I still feel that the introduction is really short (around 500 words) and only introduce the topic of the paper with 1 single sentence without even a reference. I feel that the paper would be much more appealing for a broad audience if the topic would be introduced, specifically by giving example of coordinated actions in wild animals which are plentiful (e.g. cooperative hunting, cooperative territorial defense, coordinated mate-guarding) and can be found in several taxa including dolphins (e.g. marine mammals, carnivores, apes, fish). This would only require an introductory paragraph and would strengthen the paper. I feel it is particularly important since the results reported here, only based on a sample size of 2 dyads, are anecdotal by nature.

The introduction also does not comprise clear examples of situations in the wild during which dolphins would need to coordinate actions. Such examples are provided in the discussion but should already appear here to better highlight the relevance of the study.

Methods

I appreciate the authors' effort to mention specifically that inferential statistic could not be used here. The question remains why they did statistical analyses at all. As suggested by the editor and myself they should only descriptively explore the data. The use of statistics here is misleading since the model used are statistically incorrect. Using each trial as a single data point is incorrect since the same dyad is tested a large number of time, and this cannot be accounted for by a random effect since there is not enough dyads. Therefore, the statistics presented here are a clear case of pseudo replication and the results cannot be trusted. The statistics should be removed from the paper otherwise that would lead to the publication of statistically incorrect results which is surely undesirable. The results should be presented descriptively, all the stars removed from the graphs and P-values removed from the text.

Discussion

Line 389-393: these type of information would reinforce the introduction greatly.

## Decision letter (RSOS-202073.R0)

The editorial office reopened on 4 January 2021. We are working hard to catch up after the festive break. If you need advice or an extension to a deadline, please do not hesitate to let us know -- we will continue to be as flexible as possible to accommodate the changing COVID situation. We wish you a happy New Year, and hope 2021 proves to be a better year for everyone.

Dear Dr King

The Editors assigned to your paper RSOS-202073 "Bottlenose dolphins can communicate with vocal signals to solve a cooperative task" have now received comments from reviewers and would like you to revise the paper in accordance with the reviewer comments and any comments from the Editors. Please note this decision does not guarantee eventual acceptance.

We invite you to respond to the comments supplied below and revise your manuscript. Below the referees' and Editors' comments (where applicable) we provide additional requirements. Final acceptance of your manuscript is dependent on these requirements being met. We provide guidance below to help you prepare your revision.

We do not generally allow multiple rounds of revision so we urge you to make every effort to fully address all of the comments at this stage. If deemed necessary by the Editors, your manuscript will be sent back to one or more of the original reviewers for assessment. If the original reviewers are not available, we may invite new reviewers.

Please submit your revised manuscript and required files (see below) no later than 21 days from today's (ie 25-Jan-2021) date. Note: the ScholarOne system will 'lock' if submission of the revision is attempted 21 or more days after the deadline. If you do not think you will be able to meet this deadline please contact the editorial office immediately.

Please note article processing charges apply to papers accepted for publication in Royal Society Open Science (<https://royalsocietypublishing.org/rsos/charges>). Charges will also apply to papers transferred to the journal from other Royal Society Publishing journals, as well as papers submitted as part of our collaboration with the Royal Society of Chemistry (<https://royalsocietypublishing.org/rsos/chemistry>). Fee waivers are available but must be requested when you submit your revision (<https://royalsocietypublishing.org/rsos/waivers>).

Thank you for submitting your manuscript to Royal Society Open Science and we look forward to receiving your revision. If you have any questions at all, please do not hesitate to get in touch.

Best regards,  
Lianne Parkhouse  
Editorial Coordinator  
Royal Society Open Science  
[openscience@royalsociety.org](mailto:openscience@royalsociety.org)

on behalf of Professor Kevin Padian (Subject Editor)  
[openscience@royalsociety.org](mailto:openscience@royalsociety.org)

Associate Editor Comments to Author:

It is clear that you have made substantial efforts to resolve the concerns from the earlier review at our sister journal PRSB. However, it is also plain that a number of matters remain to be resolved - the second reviewer here has identified several concerns regarding, for instance, the statistical treatment of the study. These will need to be addressed before the paper may be considered

ready for publication - please ensure that you fully address these matters as it is unlikely that a further round of revision will be permitted.

Reviewer comments to Author:

Reviewer: 1

Comments to the Author(s)

General comment: The authors have done a nice job addressing concerns about the use of statistics and mixed models to test whether the dolphins included in this study used vocalizations to coordinate cooperative action during an experimental task. They have been explicit about the statistics representing data for these two dyads, and it is fair for them to state that the results indicate that "at least some dolphins are capable of using vocal signals to facilitate . . . cooperative actions." These modifications do not detract from the value of the paper, which reports very interesting results.

I have a few, very minor suggestions below.

(1) Line 96, Cooperative task methods: I suggest the description and justification of trial phases (currently starting on Line 111) either be placed at the beginning of the "Cooperative task" section, or just start a new paragraph with that sentence to make the description of training phases more obvious to readers.

(2) Results: reporting the sample size

2i: Line 216: You indicate that "Given that sample sizes were limited to two dyads, . . ."

That might be better phrased: "Given that sample sizes represent repeated trials with two dyads, we are unable to use inferential statistics to generalize our findings beyond the dyads. (You can probably simplify this sentence to ". . . we are unable to generalize our findings beyond the dyads", for you are being sufficiently explicit between this and the following sentence.)

If you don't mention the repeated trials in the above sentence, please provide a clear indication of what the sample size,  $n$ , represents elsewhere in the 'Statistical analysis' section. That could be placed as a last sentence in this section, e.g., "The sample size refers to the number of replicated trials with each dyad." If you make it clear at the start of this section, this is not necessary.

2ii. When reporting the results in the figures, it would be useful for readers to have a clear indication of what the  $n$  represents. For example, in the caption for Figure 2, you can indicate: 'The sample size represents the number of trials per dyad with or without whistles.', with a similar description in other figure captions.

I'm sure the nature of the sample seems obvious to the authors. But readers may be confused at the large apparent sample. I think it is best to be up front - as you have been when revising many of the descriptions in the text. People often look at figures before reading other parts of a paper. They will probably respond more receptively if the nature of the sample is clear.

Susan Lingle

Reviewer: 2  
Comments to the Author(s)

In this revised version of the manuscript the authors made an effort to acknowledge that their study was not generalizable to all dolphins. The topic remains of interest but could be introduced better (see details below) which would strengthen the paper. The use of statistics is incorrect given the data even after the modification made here. The paper can therefore not be published before all the statistical analyses have been removed.

#### Introduction

I still feel that the introduction is really short (around 500 words) and only introduce the topic of the paper with 1 single sentence without even a reference. I feel that the paper would be much more appealing for a broad audience if the topic would be introduced, specifically by giving example of coordinated actions in wild animals which are plentiful (e.g. cooperative hunting, cooperative territorial defense, coordinated mate-guarding) and can be found in several taxa including dolphins (e.g. marine mammals, carnivores, apes, fish). This would only require an introductory paragraph and would strengthen the paper. I feel it is particularly important since the results reported here, only based on a sample size of 2 dyads, are anecdotal by nature.

The introduction also does not comprise clear examples of situations in the wild during which dolphins would need to coordinate actions. Such examples are provided in the discussion but should already appear here to better highlight the relevance of the study.

#### Methods

I appreciate the authors' effort to mention specifically that inferential statistic could not be used here. The question remains why they did statistical analyses at all. As suggested by the editor and myself they should only descriptively explore the data. The use of statistics here is misleading since the model used are statistically incorrect. Using each trial as a single data point is incorrect since the same dyad is tested a large number of time, and this cannot be accounted for by a random effect since there is not enough dyads. Therefore, the statistics presented here are a clear case of pseudo replication and the results cannot be trusted. The statistics should be removed from the paper otherwise that would lead to the publication of statistically incorrect results which is surely undesirable. The results should be presented descriptively, all the stars removed from the graphs and P-values removed from the text.

#### Discussion

Line 389-393: these type of information would reinforce the introduction greatly.

===PREPARING YOUR MANUSCRIPT===

Your revised paper should include the changes requested by the referees and Editors of your manuscript. You should provide two versions of this manuscript and both versions must be provided in an editable format:  
one version identifying all the changes that have been made (for instance, in coloured highlight, in bold text, or tracked changes);  
a 'clean' version of the new manuscript that incorporates the changes made, but does not highlight them. This version will be used for typesetting if your manuscript is accepted.  
Please ensure that any equations included in the paper are editable text and not embedded images.

Please ensure that you include an acknowledgements' section before your reference list/bibliography. This should acknowledge anyone who assisted with your work, but does not

qualify as an author per the guidelines at <https://royalsociety.org/journals/ethics-policies/openness/>.

While not essential, it will speed up the preparation of your manuscript proof if accepted if you format your references/bibliography in Vancouver style (please see <https://royalsociety.org/journals/authors/author-guidelines/#formatting>). You should include DOIs for as many of the references as possible.

If you have been asked to revise the written English in your submission as a condition of publication, you must do so, and you are expected to provide evidence that you have received language editing support. The journal would prefer that you use a professional language editing service and provide a certificate of editing, but a signed letter from a colleague who is a native speaker of English is acceptable. Note the journal has arranged a number of discounts for authors using professional language editing services (<https://royalsociety.org/journals/authors/benefits/language-editing/>).

#### ===PREPARING YOUR REVISION IN SCHOLARONE===

To revise your manuscript, log into <https://mc.manuscriptcentral.com/rsos> and enter your Author Centre - this may be accessed by clicking on "Author" in the dark toolbar at the top of the page (just below the journal name). You will find your manuscript listed under "Manuscripts with Decisions". Under "Actions", click on "Create a Revision".

Attach your point-by-point response to referees and Editors at Step 1 'View and respond to decision letter'. This document should be uploaded in an editable file type (.doc or .docx are preferred). This is essential.

Please ensure that you include a summary of your paper at Step 2 'Type, Title, & Abstract'. This should be no more than 100 words to explain to a non-scientific audience the key findings of your research. This will be included in a weekly highlights email circulated by the Royal Society press office to national UK, international, and scientific news outlets to promote your work.

At Step 3 'File upload' you should include the following files:

-- Your revised manuscript in editable file format (.doc, .docx, or .tex preferred). You should upload two versions:

- 1) One version identifying all the changes that have been made (for instance, in coloured highlight, in bold text, or tracked changes);
- 2) A 'clean' version of the new manuscript that incorporates the changes made, but does not highlight them.

-- An individual file of each figure (EPS or print-quality PDF preferred [either format should be produced directly from original creation package], or original software format).

-- An editable file of each table (.doc, .docx, .xls, .xlsx, or .csv).

-- An editable file of all figure and table captions.

Note: you may upload the figure, table, and caption files in a single Zip folder.

-- Any electronic supplementary material (ESM).

-- If you are requesting a discretionary waiver for the article processing charge, the waiver form must be included at this step.

-- If you are providing image files for potential cover images, please upload these at this step, and inform the editorial office you have done so. You must hold the copyright to any image provided.

-- A copy of your point-by-point response to referees and Editors. This will expedite the preparation of your proof.

At Step 6 'Details & comments', you should review and respond to the queries on the electronic submission form. In particular, we would ask that you do the following:

- Ensure that your data access statement meets the requirements at <https://royalsociety.org/journals/authors/author-guidelines/#data>. You should ensure that you cite the dataset in your reference list. If you have deposited data etc in the Dryad repository, please include both the 'For publication' link and 'For review' link at this stage.
- If you are requesting an article processing charge waiver, you must select the relevant waiver option (if requesting a discretionary waiver, the form should have been uploaded at Step 3 'File upload' above).
- If you have uploaded ESM files, please ensure you follow the guidance at <https://royalsociety.org/journals/authors/author-guidelines/#supplementary-material> to include a suitable title and informative caption. An example of appropriate titling and captioning may be found at [https://figshare.com/articles/Table\\_S2\\_from\\_Is\\_there\\_a\\_trade-off\\_between\\_peak\\_performance\\_and\\_performance\\_breadth\\_across\\_temperatures\\_for\\_aerobic\\_scope\\_in\\_teleost\\_fishes\\_/3843624](https://figshare.com/articles/Table_S2_from_Is_there_a_trade-off_between_peak_performance_and_performance_breadth_across_temperatures_for_aerobic_scope_in_teleost_fishes_/3843624).

At Step 7 'Review & submit', you must view the PDF proof of the manuscript before you will be able to submit the revision. Note: if any parts of the electronic submission form have not been completed, these will be noted by red message boxes.

## Author's Response to Decision Letter for (RSOS-202073.R0)

See Appendix A.

## RSOS-202073.R1 (Revision)

### Review form: Reviewer 2

**Is the manuscript scientifically sound in its present form?**

Yes

**Are the interpretations and conclusions justified by the results?**

Yes

**Is the language acceptable?**

Yes

**Do you have any ethical concerns with this paper?**

No

**Have you any concerns about statistical analyses in this paper?**

No

**Recommendation?**

Accept as is



**Comments to the Author(s)**

The authors have thoroughly revised their interpretation of the results and the manuscript can be published as such.

**Decision letter (RSOS-202073.R1)**

We hope you are keeping well at this difficult and unusual time. We continue to value your support of the journal in these challenging circumstances. If Royal Society Open Science can assist you at all, please don't hesitate to let us know at the email address below.

Dear Dr King,

It is a pleasure to accept your manuscript entitled "Evidence that bottlenose dolphins can communicate with vocal signals to solve a cooperative task" in its current form for publication in Royal Society Open Science. The comments of the reviewers who reviewed your manuscript are included at the foot of this letter.

Please ensure that you send to the editorial office an editable version of your accepted manuscript, and individual files for each figure and table included in your manuscript. You can send these in a zip folder if more convenient. Failure to provide these files may delay the processing of your proof. You may disregard this request if you have already provided these files to the editorial office.

You can expect to receive a proof of your article in the near future. Please contact the editorial office ([openscience@royalsociety.org](mailto:openscience@royalsociety.org)) and the production office ([openscience\\_proofs@royalsociety.org](mailto:openscience_proofs@royalsociety.org)) to let us know if you are likely to be away from e-mail contact -- if you are going to be away, please nominate a co-author (if available) to manage the proofing process, and ensure they are copied into your email to the journal.

Due to rapid publication and an extremely tight schedule, if comments are not received, your paper may experience a delay in publication.

Please see the Royal Society Publishing guidance on how you may share your accepted author manuscript at <https://royalsociety.org/journals/ethics-policies/media-embargo/>. After publication, some additional ways to effectively promote your article can also be found here <https://royalsociety.org/blog/2020/07/promoting-your-latest-paper-and-tracking-your-results/>.

Thank you for your fine contribution. On behalf of the Editors of Royal Society Open Science, we look forward to your continued contributions to the Journal.

Best regards,  
Lianne Parkhouse  
Editorial Coordinator  
Royal Society Open Science  
[openscience@royalsociety.org](mailto:openscience@royalsociety.org)

on behalf of Professor Kevin Padian (Subject Editor)  
[openscience@royalsociety.org](mailto:openscience@royalsociety.org)

Associate Editor Comments to Author:

The reviewer considers your work ready for acceptance and publication - congratulations and thank you for the support of the journal! We hope you will submit to us again in future (and we certainly encourage it!).

Reviewer comments to Author:

Reviewer: 2

Comments to the Author(s)

The authors have thoroughly revised their interpretation of the results and the manuscript can be published as such.

Follow Royal Society Publishing on Twitter: @RSocPublishing

Follow Royal Society Publishing on Facebook:

<https://www.facebook.com/RoyalSocietyPublishing.FanPage/>

Read Royal Society Publishing's blog:

<https://royalsociety.org/blog/blogsearchpage/?category=Publishing>

## Appendix A

Associate Editor Comments to Author:

It is clear that you have made substantial efforts to resolve the concerns from the earlier review at our sister journal PRSB. However, it is also plain that a number of matters remain to be resolved - the second reviewer here has identified several concerns regarding, for instance, the statistical treatment of the study. These will need to be addressed before the paper may be considered ready for publication - please ensure that you fully address these matters as it is unlikely that a further round of revision will be permitted.

**Author response: We have now revised the manuscript further in light of these comments. We provide a detailed point by point response to the reviewer's concerns below. With regards to the comment from Reviewer 2 regarding the statistical treatment of the study, we provide a comprehensive answer to that concern below. To summarise, if the scope of the question is understanding responses only at the level they were measured i.e., the dyad, then inferential statistics are valid for that purpose (we provide recent papers on this topic) – we are just not able to generalize our findings beyond the dyads. We have, thus, retained the statistics but revised our manuscript further to make it explicitly clear that our results only pertain to these two dyads. This includes toning down the title and using due caution throughout the manuscript (Abstract, lines: 25-26 and 30-33; Methods, lines 26-29; Results, lines 273-274, Discussion, lines 346-348, 409-410, and 416-417).**

Reviewer: 1

General comment: The authors have done a nice job addressing concerns about the use of statistics and mixed models to test whether the dolphins included in this study used vocalizations to coordinate cooperative action during an experimental task. They have been explicit about the statistics representing data for these two dyads, and it is fair for them to state that the results indicate that “at least some dolphins are capable of using vocal signals to facilitate . . . cooperative actions.” These modifications do not detract from the value of the paper, which reports very interesting results.

**Author response: We thank the reviewer for their positive appraisal of our manuscript.**

I have a few, very minor suggestions below.

(1) Line 96, Cooperative task methods: I suggest the description and justification of trial phases (currently starting on Line 111) either be placed at the beginning of the “Cooperative task” section, or just start a new paragraph with that sentence to make the description of training phases more obvious to readers.

**Author response: We have now made this a new paragraph.**

(2) Results: reporting the sample size

2i: Line 216: You indicate that “Given that sample sizes were limited to two dyads, . . .”

That might be better phrased: “Given that sample sizes represent repeated trials with two dyads, we are unable to use inferential statistics to generalize our findings beyond the dyads.

(You can probably simplify this sentence to “. . . we are unable to generalize our findings beyond the dyads”, for you are being sufficiently explicit between this and the following sentence.)

If you don't mention the repeated trials in the above sentence, please provide a clear indication of what the sample size,  $n$ , represents elsewhere in the 'Statistical analysis' section. That could be placed as a last sentence in this section, e.g., “The sample size refers to the number of replicated trials with each dyad.” If you make it clear at the start of this section, this is not necessary.

**Author response: We have made the initial suggested change. The sentence now reads: “Given that sample sizes represent repeated trials with two dyads, we are unable to generalize our findings beyond the dyads.”**

**We have also clarified throughout this section that the tests we are using are exploring the behaviour “for these two dyads”.**

2ii. When reporting the results in the figures, it would be useful for readers to have a clear indication of what the  $n$  represents. For example, in the caption for Figure 2, you can indicate: ‘The sample size represents the number of trials per dyad with or without whistles.’, with a similar description in other figure captions.

I'm sure the nature of the sample seems obvious to the authors. But readers may be confused at the large apparent sample. I think it is best to be up front – as you have been when revising many of the descriptions in the text. People often look at figures before reading other parts of a paper. They will probably respond more receptively if the nature of the sample is clear.

**Author response: This is a good point and one we previously overlooked. We have now added “Sample size (N) represents the number of trials per dyad with or without whistles.” To the Figure 2 legend.**

Susan Lingle

Reviewer: 2

Comments to the Author(s)

In this revised version of the manuscript the authors made an effort to acknowledge that their study was not generalizable to all dolphins. The topic remains of interest but could be introduced better (see details below) which would strengthen the paper. The use of statistics is incorrect given the data even after the modification made here. The paper can therefore not be published before all the statistical analyses have been removed.

**Author response: Thank you for the constructive comments on our paper. However, the use of statistics is not incorrect. Below the reviewer states that “The use of statistics here is misleading since the model used are statistically incorrect. Using each trial as a single data point is incorrect since the same dyad is tested a large number of time, and this cannot be accounted for by a random effect since there is not enough dyads. Therefore, the statistics presented here are a clear case of pseudo replication and the results cannot be trusted”**

**The risk of type 1 errors with pseudo-replication is at the level of the population or species. If the scope of the question is understanding responses only at the level they were measured i.e., the dyad, then inferential statistics can be used to examine the extent that observed differences are meaningful for that individual/dyad etc. The reviewer is absolutely correct that we cannot generalize beyond our two dyads, and we have made further revisions to the manuscript to ensure that our results cannot be misconstrued by the reader (including toning down the title). We hope the reviewer finds the manuscript much improved as a result. However, we have not removed the statistics from the paper because the inclusion of these statistical tests to quantify the behaviour of our two dyads is valid. We cite recent papers on this topic below.**

1. C. Y. Jordan, Population sampling affects pseudoreplication. *PLoS Biol.* **16**, 1–3 (2018).

For example, see Page 2/3 (Similarly, if a study uses only samples from a single individual, genotype, or family, it will be pseudoreplicated if it aims to make inferences at a higher level (e.g., for a population or species) but not if the study aims to understand responses only at the level at which they are measured: whether a study is pseudoreplicated depends on its scope).

2. S. E. Lazic, C. J. Clarke-Williams, M. R. Munafò, What exactly is “N” in cell culture and animal experiments? *PLOS Biol.* **16**, e2005282 (2018).

For example, see Page 10/14 (Nonhuman primate experiments tend to have small sample sizes for both cost and ethical reasons, but the requirements for genuine replication remain the same. Suppose an experiment records from a single neuron while pictures of a happy monkey or a sad monkey are shown to the subject. One-hundred pictures are shown in random order, and for each trial the firing rate of the neuron is measured. We find that the neuron fires at a faster rate in the happy monkey condition, and the sample size is the 100 trials (this design resembles Fig 2D). This seems to be an easy way of obtaining a large sample size with only 1 subject and only 1 neuron, but the catch is that the results apply only to this subject and to this neuron, and little can be said about what might be seen in other subjects or other neurons. A statistical test would be valid, but the hypothesis tested is uninteresting. One may argue that this subject is representative of others, but this is a nonstatistical generalisation, and the smallness of the p-value does not provide more evidence about what might happen in other subjects (showing that a drug works for Jim ( $p < 0.001$ ) does not provide strong evidence that it works for Bob, or anyone else).

3. N. Colegrave, G. D. Ruxton, Using Biological Insight and Pragmatism When Thinking about Pseudoreplication. *Trends Ecol. Evol.* **33**, 28–35 (2018).

For example, see Box 2 (Our view is that such use of statistics can aid the reader and should not mislead the reader provided the authors stick to interpreting their data appropriately, essentially remembering that they are seeking to understand one specific island and not islands generally).

## Introduction

I still feel that the introduction is really short (around 500 words) and only introduce the topic of the paper with 1 single sentence without even a reference. I feel that the paper would be much more appealing for a broad audience if the topic would be introduced, specifically by giving example of coordinated actions in wild animals which are plentiful (e.g. cooperative hunting, cooperative territorial defense, coordinated mate-guarding) and can be found in several taxa including dolphins (e.g. marine mammals, carnivores, apes, fish). This would only require an introductory paragraph and would strengthen the paper. I feel it is particularly important since the results reported here, only based on a sample size of 2 dyads, are anecdotal by nature.

The introduction also does not comprise clear examples of situations in the wild during which

dolphins would need to coordinate actions. Such examples are provided in the discussion but should already appear here to better highlight the relevance of the study.

**Author response: We have now revised our introduction to include a discussion of coordinated actions in other species and then specific examples of cooperation/coordination in wild dolphins.**

#### Methods

I appreciate the authors' effort to mention specifically that inferential statistic could not be used here. The question remains why they did statistical analyses at all. As suggested by the editor and myself they should only descriptively explore the data. The use of statistics here is misleading since the model used are statistically incorrect. Using each trial as a single data point is incorrect since the same dyad is tested a large number of time, and this cannot be accounted for by a random effect since there is not enough dyads. Therefore, the statistics presented here are a clear case of pseudo replication and the results cannot be trusted. The statistics should be removed from the paper otherwise that would lead to the publication of statistically incorrect results which is surely undesirable. The results should be presented descriptively, all the stars removed from the graphs and P-values removed from the text.

**Author response: The statistics are not incorrect, nor are the results themselves incorrect (see response above), but the generalization of our results would be incorrect. We have taken further measures to revise the manuscript, making it explicitly clear we cannot generalize beyond our two dyads.**

#### Discussion

Line 389-393: these type of information would reinforce the introduction greatly.

**Author response: We have now revised the introduction accordingly.**
